# Supplementary material for: Deciphering the dynamic behavior of geminal-Cu sites for high-efficiency reduction of nitrate to ammonia
Source: Royal Society of Chemistry journal article supplement (doi:10.1039/d5ta09093h), 2025-12-09
Supplement: d5ta09093h1.pdf [file d5ta09093h1.pdf]

## Supporting Information

### Deciphering the Dynamic Behavior of Geminal-Cu Sites for High-Efficient Nitrate Reduction to Ammonia

Wanxiang Yang,<sup>a</sup> Xue Yin,<sup>a</sup> Yaofeng Yuan,<sup>a</sup> and Wei Lin<sup>\*ab</sup>

<sup>a</sup> State Key Laboratory of Photocatalysis on Energy and Environment, College of Chemistry, Fuzhou University, Fuzhou, 350108, People's Republic of China

<sup>b</sup> Fujian Provincial Key Laboratory of Theoretical and Computational Chemistry, Xiamen, Fujian, 361005, People's Republic of China

E-mail: wlin@fzu.edu.cn (W. Lin)

#### Computed Gibbs free energy of NO<sub>3</sub><sup>-</sup>

The Gibbs free energy change for the adsorption of aqueous nitrate onto the electrode surface (NO<sub>3</sub><sup>-</sup>(l) to forming \*NO<sub>3</sub>) was calculated using a thermodynamic cycle<sup>1,2</sup> that employs HNO<sub>3</sub>(g) as a reference, according to the following three steps:

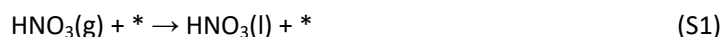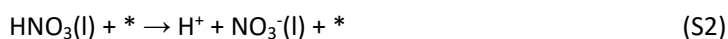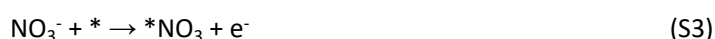

therefore, the adsorption of nitrate as described below ,

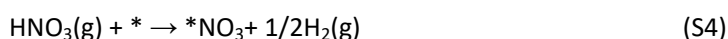

the adsorption Gibbs free energy of NO<sub>3</sub><sup>-</sup> referenced to HNO<sub>3</sub>(g), estimated as:

$$\Delta G_{\text{ads}}(*\text{NO}_3) = G_{*\text{NO}_3} - (E_{\text{Cu}/\text{PCN}} + G_{\text{gas}}(\text{HNO}_3) - 1/2G_{\text{H}_2}) \quad (\text{S5})$$

where  $G_{*\text{NO}_3}$ ,  $G_{\text{gas}}(\text{HNO}_3)$ , and  $G_{\text{H}_2}$  are all calculated using the relation  $G = E + (\Delta H - T\Delta S)$ , with  $E$ ,  $\Delta H$ , and  $\Delta S$  is electronic energies obtained from DFT calculations, enthalpic and entropic contributions, respectively. All Gibbs free energy calculations were performed at 298.15 K and 1 atm. The  $\Delta G$  for HNO<sub>3</sub>(g) relative to solution is approximately 0.392 eV.<sup>3</sup>

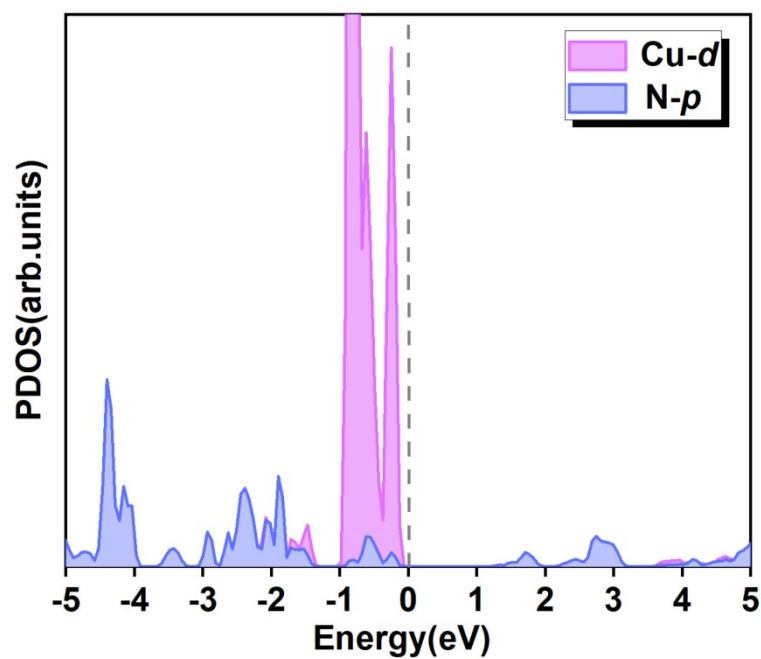

Fig. S1 The PDOS of  $\text{Cu}_g/\text{PCN}$ . The Fermi level (0 eV) is indicated by the gray dashed line.

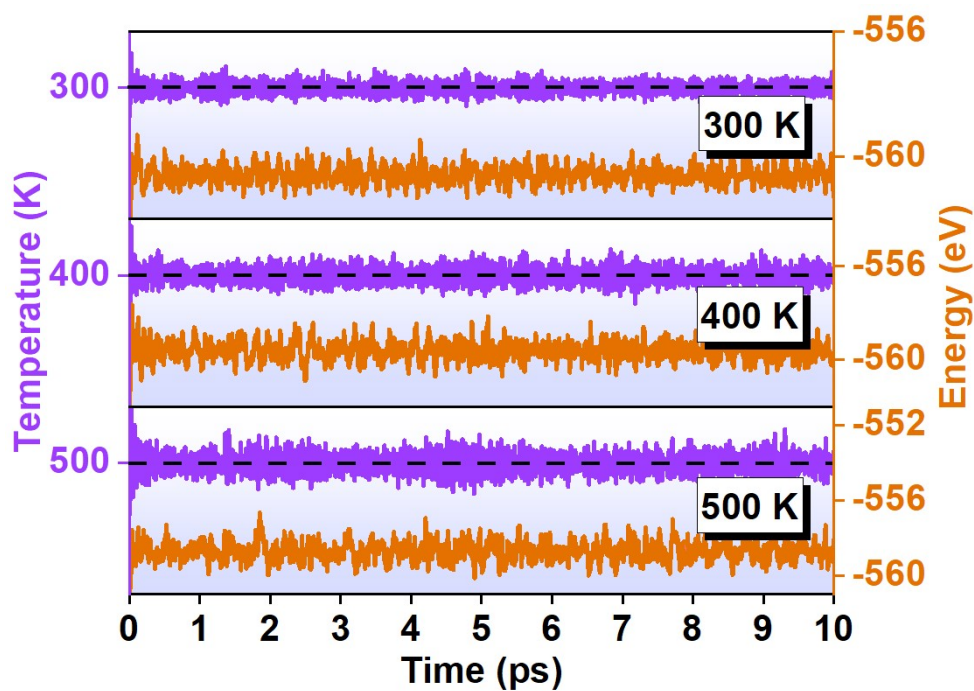

Fig. S2. The AIMD simulations of  $\text{Cu}_g/\text{PCN}$  models were conducted at 300 K, 400 K, and 500 K for 10 ps using a 1fs time step.

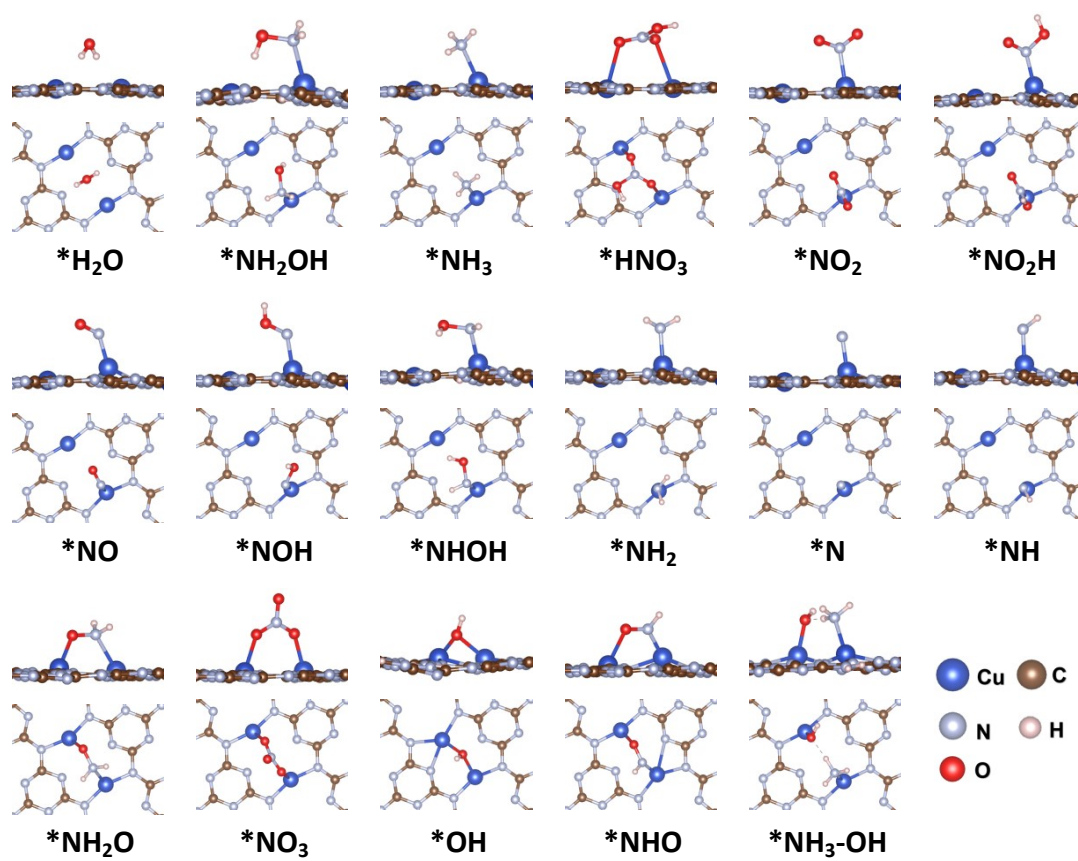

Fig. S3 Optimized structures of all intermediates in the NO<sub>3</sub> reduction mechanism. The blue, gray, red, brown and light pink balls represent Cu, N, O, C and H atoms, respectively.

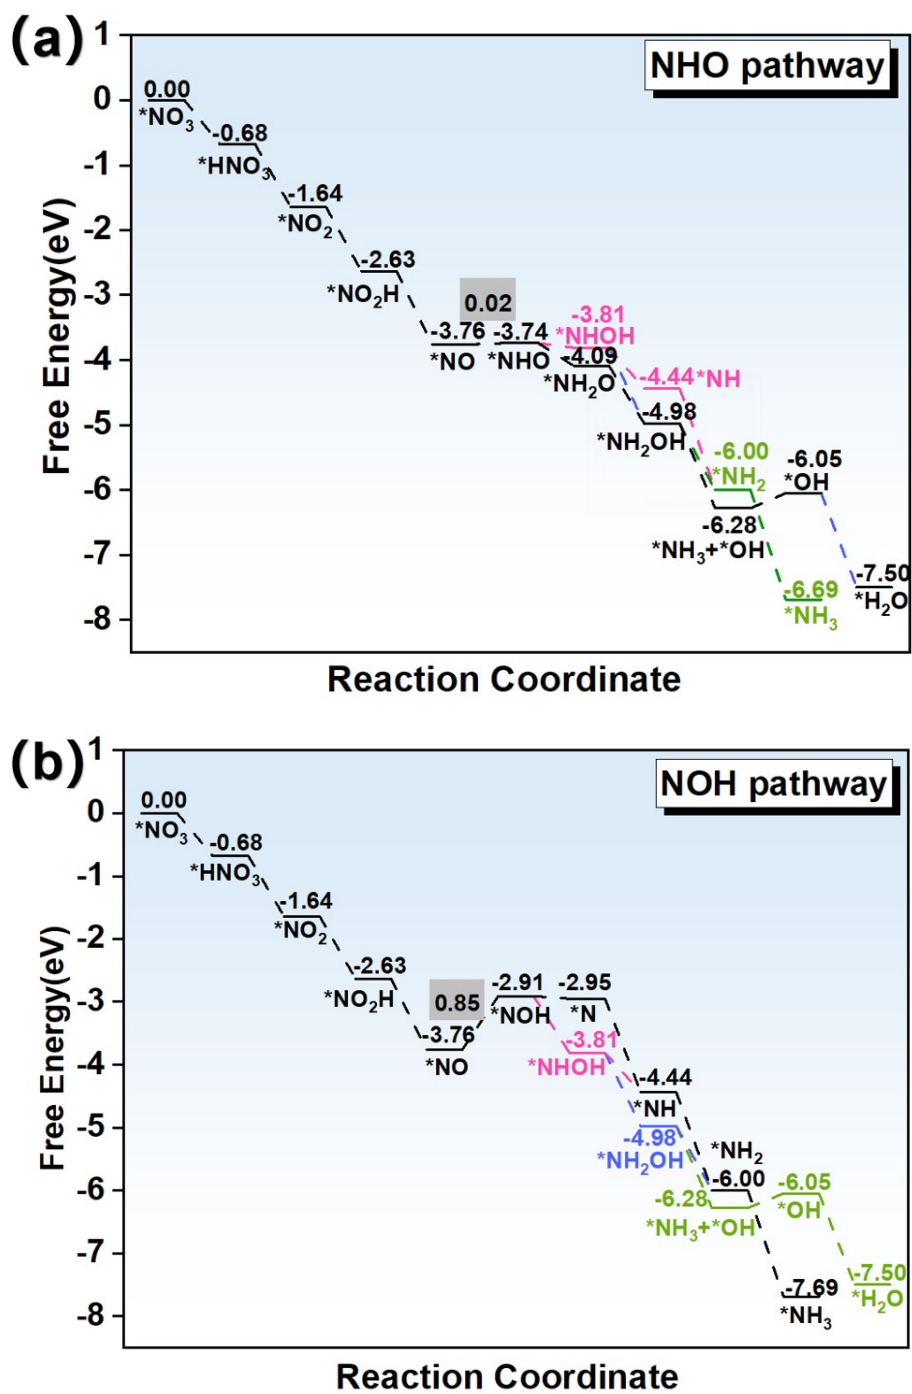

Fig. S4 Free energy diagrams of possible reaction pathways for  $\text{NO}_3\text{RR}$  on  $\text{Cu}_g/\text{PCN}$  ( $T = 298.15 \text{ K}$ ,  $\text{pH} = 0$ ). (a) The NHO pathway; (b) the NOH pathway.

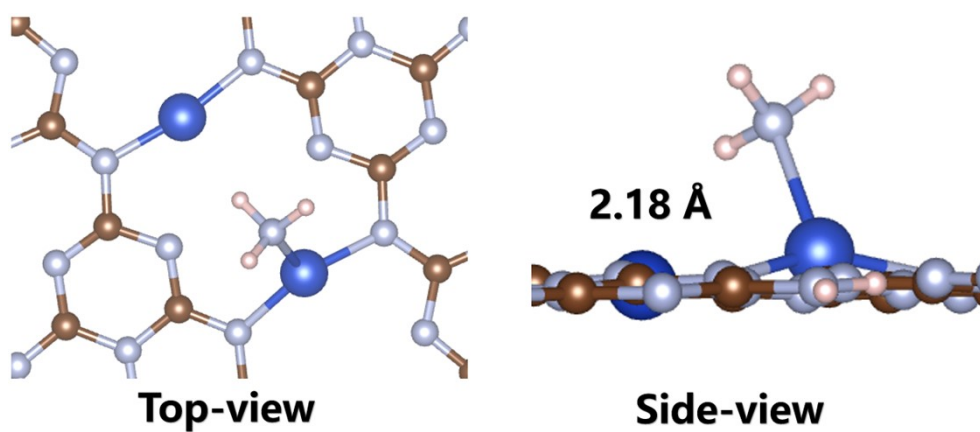

$$E_{\text{ads}} = -0.38 \text{ eV}$$

$$\Delta G_{* \text{NH}_3 \rightarrow * + \text{NH}_3(\text{g})} = -0.13 \text{ eV}$$

Fig. S5 Optimized structure ( $d_{\text{Cu-N}} = 2.18 \text{ \AA}$ ) and adsorption energy of  $*\text{NH}_3$  on  $\text{Cu}_9/\text{PCN}$  (compared to  $E_{\text{ads}} = -0.32 \text{ eV}$  in reference<sup>4</sup>).

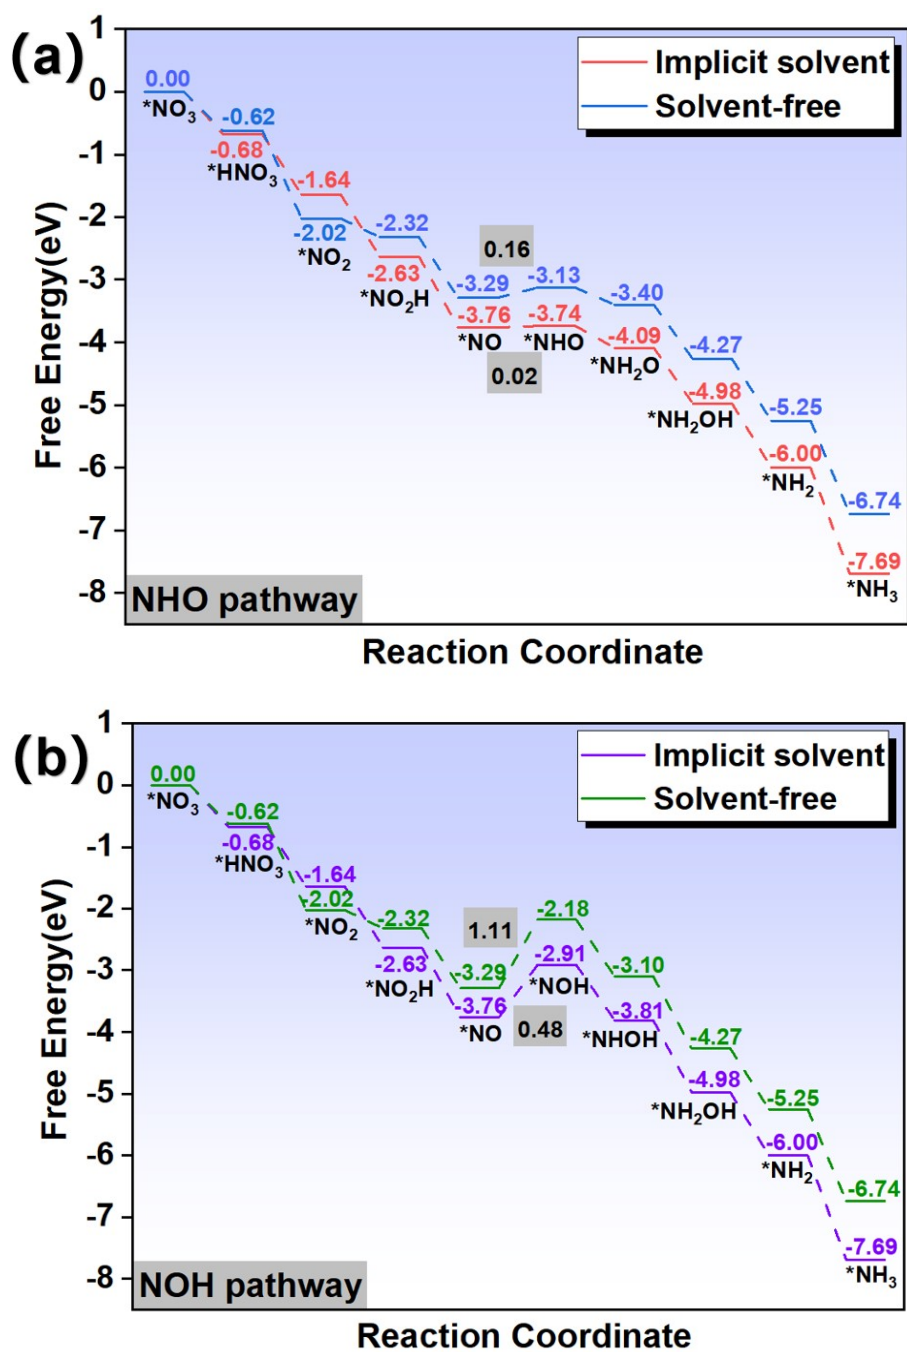

Fig. S6 Comparison of free energy diagrams for NO<sub>3</sub>RR under solvent-free and implicit solvent environment (T = 298.15 K, pH = 0). (a) The NHO pathways; (b) the NOH pathways.

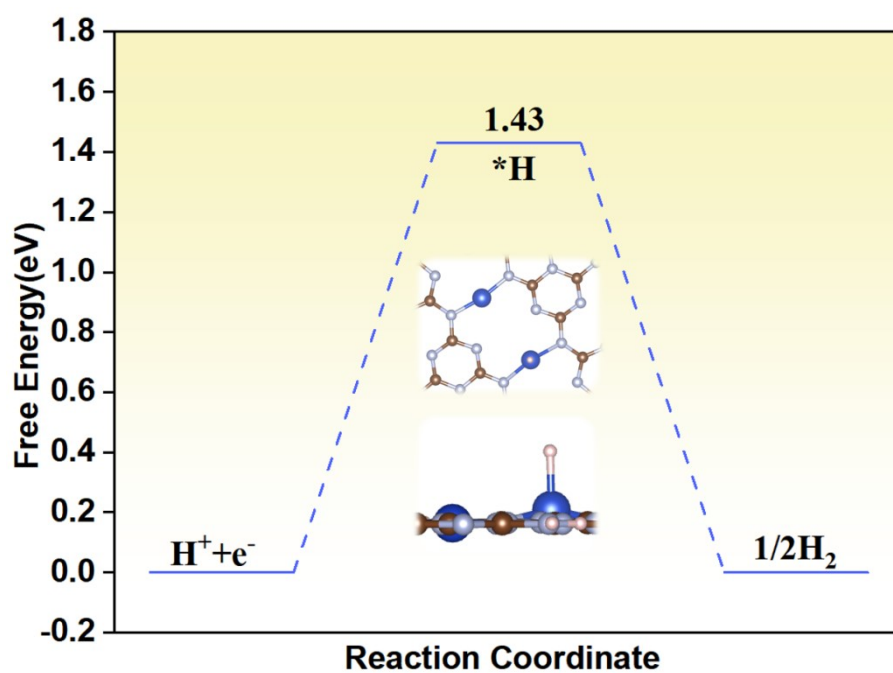

Fig. S7 Free energy profile of the HER catalyzed by  $Cu_g/PCN$  ( $T = 298.15$  K,  $pH = 0$ ).

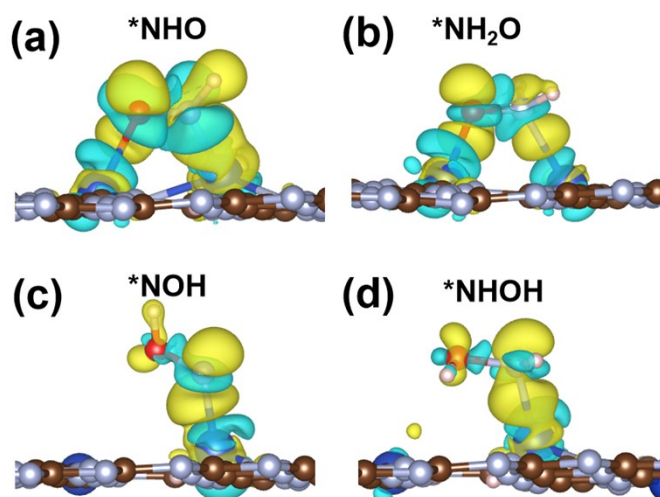

Fig. S8 Charge density difference analysis of key intermediates adsorbed on geminal-Cu sites.

(a)\*NHO; (b)\*NH<sub>2</sub>O; (c)\*NOH; (d)\*NHOH. The isovalue was set to  $0.002 \text{ eV} \cdot \text{bohr}^{-3}$ .

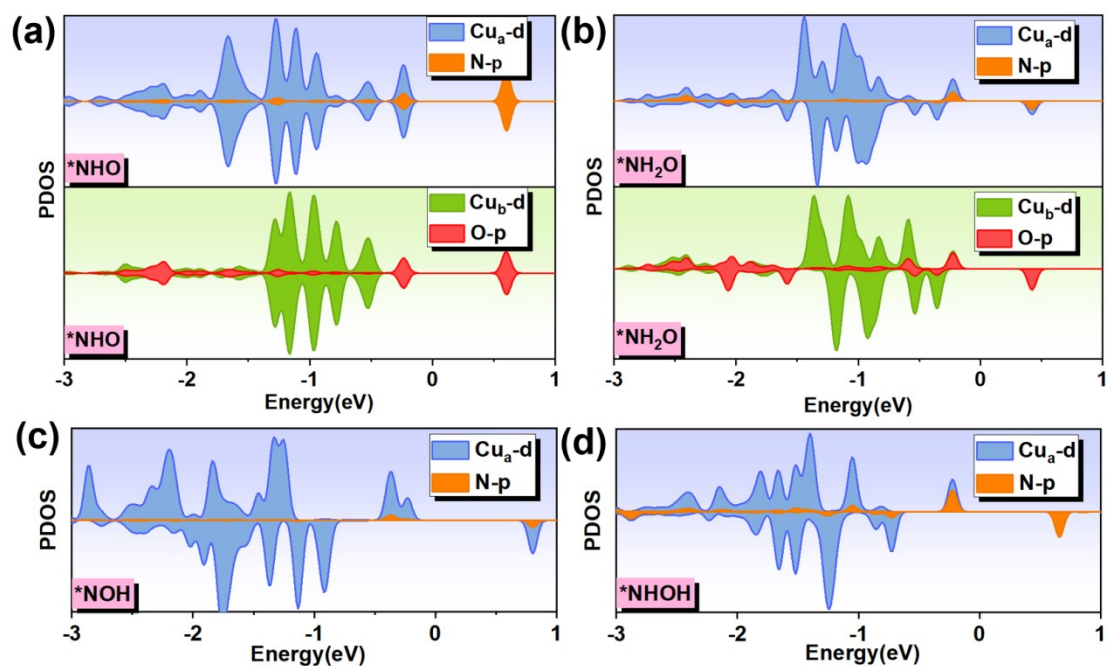

Fig. S9 PDOS analysis of key intermediates adsorbed on geminal-Cu sites. (a)\*NHO; (b)\*NH<sub>2</sub>O; (c)\*NOH; (d)\*NHOH.

Table S1 Calculated Gibbs free energy,  $\Delta E$ ,  $\Delta E_{\text{ZPE}}$ ,  $\Delta S$  (in eV) of \*NH<sub>3</sub> desorbed on Cu<sub>g</sub>/PCN (pH=0, T=298.15K).

| Cu <sub>g</sub> /PCN                       | $\Delta E$ | $\Delta E_{\text{ZPE}}$ | T $\Delta S$ | $\Delta G$ |
|--------------------------------------------|------------|-------------------------|--------------|------------|
| *NH <sub>3</sub> → * + NH <sub>3</sub> (g) | 0.38       | -0.09                   | 0.42         | -0.13      |

## REFERENCES

- 1 W. M. Haynes, D. R. Lide and T. J. Bruno, Eds., *CRC Handbook of Chemistry and Physics*, CRC Press, 97th edn., 2016.
- 2 F. Calle-Vallejo, M. Huang, J. B. Henry, M. T. M. Koper and A. S. Bandarenka, *Phys. Chem. Chem. Phys.*, 2013, **15**, 3196.
- 3 J.-X. Liu, D. Richards, N. Singh and B. R. Goldsmith, *ACS Catal.*, 2019, **9**, 7052–7064.
- 4 J. D. Gouveia and J. R. B. Gomes, *Surfaces and Interfaces*, 2024, **46**, 104114.
